# Supplementary material for: Diffusion kinetics of 3 He in pyroxene and plagioclase and applications to cosmogenic exposure dating and paleothermometry in mafic rocks
Source: Copernicus journal article supplement (doi:10.5194/gchron-7-493-2025), 2025-10-22
Supplement: Supplementary file [file gchron-7-493-2025-supplement-title-page.pdf › gchron-7-493-2025-supplement-title-page.pdf]

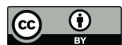

## *Supplement of*

# **Diffusion kinetics of $^3\text{He}$ in pyroxene and plagioclase and applications to cosmogenic exposure dating and paleothermometry in mafic rocks**

**Marie Bergelin et al.**

*Correspondence to:* Marie Bergelin (mbergelin@bgc.org)

- gchron-7-493-2025-supplement-title-page.pdf
- Supplement
  - Bergelin\_MDD\_forward\_model
    - \* Ddata
    - \* README.txt
    - \* explore\_MDD.m
    - \* get\_MDD\_misfit.m
    - \* initDiff\_GUI.m
    - \* make\_MDD\_fig\_3\_4.m
    - \* make\_MDD\_fig\_6\_7.m
    - \* nonlcon\_MDD.m
    - \* objective\_MDD\_model.m
    - \* optimizer\_MDD\_Domain.m
    - \* plot\_Ddata.m
    - \* plot\_MDD\_forward\_model.m
    - \* unpack\_Ddata.m
  - Supplementary material.pdf

The copyright of individual parts of the supplement might differ from the article licence.
